# Supplementary material
Source: publisher figshare collection journal article supplement (https://gsapubs.figshare.com/ndownloader/files/25378595)
Supplement: Supplementary file 1 [file 25378595]

## Sheet: Sheet1
Table S2. Zircon LA-ICP-MS analytical data of the foliated and non-foliated igneous rocks in the Baluntai domain of the Chinese Central Tianshan Block.
Spot	Th	U	Th/U	Isotopic ratios						Age (Ma)
	ppm	ppm		207Pb/206Pb	1σ	207Pb/235U	1σ	206Pb/238U	1σ	207Pb/206Pb	1σ	207Pb/235U	1σ	206Pb/238U	1σ
JT59-1 Gneissic granite (GPS: N43°00'12", E86°06'13")
1	76.44	282.44	0.270642	0.05499	0.00121	0.48749	0.01131	0.06428	0.00087	412	29	403	8	402	5
2	47.59	248.87	0.191224	0.05446	0.00125	0.48067	0.01156	0.064	0.00087	390	30	399	8	400	5
3	58.07	493.83	0.117591	0.05452	0.00186	0.49299	0.01705	0.06557	0.00096	393	51	407	12	409	6
4	64.94	152.08	0.427012	0.0552	0.00257	0.48879	0.02297	0.06421	0.0009	420	80	404	16	401	5
5	52.77	266.26	0.19819	0.05476	0.00182	0.48794	0.01653	0.06462	0.0009	402	51	404	11	404	5
6	71.74	463.54	0.154766	0.05486	0.00129	0.49196	0.01219	0.06503	0.00088	407	32	406	8	406	5
7	68.71	127.65	0.538269	0.05515	0.00259	0.50744	0.02406	0.06672	0.00096	418	80	417	16	416	6
8	70.83	249.55	0.283831	0.05505	0.00305	0.49162	0.02706	0.06476	0.00109	414	93	406	18	405	7
9	71.68	114.48	0.626136	0.05459	0.00278	0.4916	0.02525	0.0653	0.00093	395	90	406	17	408	6
10	62.35	244.28	0.25524	0.05511	0.00162	0.50169	0.01511	0.06601	0.00092	417	43	413	10	412	6
11	80.22	411.13	0.195121	0.05502	0.00125	0.48968	0.01171	0.06454	0.00088	413	30	405	8	403	5
12	121.57	352.75	0.344635	0.0549	0.00144	0.48703	0.01329	0.06433	0.00087	408	37	403	9	402	5
13	274.76	404.24	0.679695	0.05471	0.00118	0.49714	0.0114	0.06589	0.00089	400	28	410	8	411	5
14	280.37	376.24	0.745189	0.05496	0.00159	0.49105	0.01455	0.06479	0.00091	411	41	406	10	405	6
15	105.39	394.75	0.266979	0.05505	0.00139	0.50631	0.01334	0.0667	0.00092	414	35	416	9	416	6
16	189.79	396.47	0.4787	0.05515	0.00183	0.51054	0.01725	0.06712	0.00096	418	50	419	12	419	6
17	62.01	243.11	0.25507	0.05531	0.00157	0.51076	0.01503	0.06697	0.00092	425	41	419	10	418	6
18	56.02	301.29	0.185934	0.0547	0.00165	0.48336	0.01497	0.06407	0.00088	400	45	400	10	400	5
19	105.81	480.84	0.220052	0.05542	0.00276	0.50016	0.02478	0.06545	0.00107	429	81	412	17	409	6
20	106.45	850.79	0.125119	0.05453	0.00123	0.48564	0.0116	0.06458	0.00088	393	30	402	8	403	5
21	469.25	622.91	0.753319	0.05523	0.0014	0.49722	0.01311	0.06529	0.0009	422	35	410	9	408	5
22	106.35	388.82	0.27352	0.05495	0.00135	0.50734	0.01307	0.06696	0.00091	410	34	417	9	418	5
23	114.36	601.03	0.190273	0.05474	0.0012	0.48792	0.01134	0.06463	0.00088	402	29	403	8	404	5
24	100.13	229.63	0.436049	0.0549	0.00189	0.48658	0.01701	0.06427	0.00093	408	52	403	12	402	6
19W43 Gneissic granodiorite (GPS: N42°47'53.67", E86°20'34.64")
1	199.751	435.583	0.458583	0.0563452	0.00134919	0.577505	0.0140802	0.0740937	0.000517262	464.86	51.8475	462.857	9.06836	460.772	3.11442
2	273.298	490.918	0.556709	0.0559922	0.00187178	0.571492	0.0187326	0.0738626	0.000636687	453.75	74.065	458.979	12.1076	459.385	3.83008
3	86.8004	220.885	0.392967	0.056289	0.00178308	0.577004	0.0175707	0.0744368	0.000680792	464.86	70.365	462.534	11.3176	462.831	4.09226
4	176.433	360.633	0.48923	0.0557863	0.0014781	0.573145	0.0152534	0.0743389	0.00060944	442.64	59.2525	460.047	9.85024	462.243	3.66536
5	117.852	369.959	0.318555	0.0579136	0.00139675	0.593859	0.0145754	0.0740991	0.000518755	527.815	58.325	473.329	9.29095	460.804	3.12334
6	208.362	421.449	0.494394	0.0566169	0.00123726	0.580458	0.0128617	0.0741929	0.000645183	475.97	48.1425	464.756	8.26921	461.367	3.87986
7	116.701	375.291	0.310962	0.0560777	0.00140591	0.57589	0.0154323	0.074051	0.000606092	453.75	55.55	461.817	9.94836	460.516	3.64623
8	275.296	481.831	0.571353	0.0558909	0.00152021	0.56984	0.0152663	0.0737614	0.000602092	455.6	59.2525	457.911	9.87925	458.777	3.62319
9	123.89	312.53	0.396409	0.0556885	0.00139016	0.570024	0.01443	0.0740373	0.000660505	438.935	55.55	458.03	9.33754	460.433	3.97216
10	125.708	381.513	0.329499	0.0559657	0.0013399	0.571585	0.013609	0.0738972	0.000642925	450.045	51.845	459.039	8.79814	459.592	3.86734
11	165.94	389.503	0.426031	0.0554628	0.00144361	0.567315	0.0150623	0.0738351	0.000648535	431.53	57.4025	456.276	9.76301	459.22	3.90115
12	126.694	358.103	0.353793	0.0561496	0.00153535	0.574544	0.0158324	0.0739527	0.000622388	457.45	59.2525	460.949	10.2147	459.926	3.74414
13	141.501	383.83	0.368655	0.0556788	0.00155988	0.574451	0.0160626	0.0745546	0.000635218	438.935	62.955	460.889	10.3637	463.537	3.81898
14	215.667	636.389	0.338892	0.0564726	0.00153136	0.577327	0.0156076	0.0739921	0.000751033	472.265	61.105	462.742	10.0521	460.162	4.51476
15	259.869	509.316	0.510232	0.0566194	0.00143567	0.578093	0.0146089	0.0738402	0.000601946	475.97	55.55	463.235	9.40501	459.25	3.62207
16	215.754	359.051	0.600899	0.0574113	0.001483	0.580452	0.0149176	0.0731196	0.000581386	505.595	57.4025	464.752	9.58922	454.923	3.50112
17	100.075	319.89	0.312842	0.057182	0.0015271	0.579747	0.0151763	0.0734944	0.000668864	498.19	63.8825	464.299	9.75968	457.174	4.02416
18	75.2816	245.128	0.307112	0.0564671	0.00157048	0.577077	0.0162045	0.0739352	0.000627428	472.265	61.105	462.582	10.4378	459.82	3.77438
19	412.17	678.245	0.607701	0.0561126	0.00116909	0.574891	0.0120009	0.074119	0.000601724	457.45	46.29	461.173	7.74371	460.924	3.61986
W2-3 Augen granitic gneiss (GPS: N42°46'26", E86°16'26")
1	341.63	913.79	0.373861	0.05539	0.00115	0.54392	0.0098	0.07122	0.00072	428	47	441	6	443	4
2	251.48	487.97	0.51536	0.05671	0.00096	0.55306	0.00891	0.07074	0.00078	480	18	447	6	441	5
3	321.13	767.05	0.418656	0.05568	0.00101	0.55056	0.00949	0.07171	0.00081	440	20	445	6	446	5
4	254.24	665.54	0.382006	0.0562	0.00065	0.54353	0.00599	0.07014	0.00072	460	11	441	4	437	4
5	550.67	1438.05	0.382928	0.05587	0.00046	0.54077	0.00425	0.0702	0.00069	447	10	439	3	437	4
6	370.96	714.33	0.519312	0.05515	0.00174	0.54508	0.01636	0.07169	0.00101	418	42	442	11	446	6
7	187.15	471.9	0.396588	0.055	0.00064	0.53741	0.00597	0.07086	0.00072	412	11	437	4	441	4
8	364.19	862.56	0.42222	0.05569	0.00057	0.54484	0.00528	0.07096	0.00071	440	10	442	3	442	4
9	379.86	814.72	0.466246	0.05591	0.00053	0.55187	0.00503	0.07159	0.00071	449	10	446	3	446	4
10	541.78	1884.75	0.287455	0.05531	0.00091	0.54245	0.00851	0.07112	0.00078	425	17	440	6	443	5
11	300.95	765.8	0.392988	0.05534	0.00058	0.54169	0.00545	0.07099	0.00072	426	10	440	4	442	4
12	869.68	1337.36	0.650296	0.05689	0.00068	0.54783	0.00627	0.06984	0.00072	487	11	444	4	435	4
13	410.18	932.97	0.43965	0.05569	0.0006	0.53822	0.00551	0.0701	0.00071	440	10	437	4	437	4
14	446.97	1589.4	0.281219	0.05613	0.00117	0.55231	0.01096	0.07136	0.00084	458	24	447	7	444	5
15	231.46	688.33	0.336263	0.05953	0.00276	0.57688	0.02543	0.07028	0.0013	587	64	462	16	438	8
16	414.9	796.35	0.521002	0.05622	0.00066	0.55245	0.00622	0.07127	0.00073	461	11	447	4	444	4
17	426.72	1242.25	0.343506	0.05816	0.00063	0.56421	0.00581	0.07036	0.00071	536	10	454	4	438	4
W3-1 Biotite-two feldspar gneiss (GPS: N42°46'12", E86°16'27")
1	280.685	630.726	0.445019	0.056959	0.001455	0.63347	0.016558	0.080485	0.000743	500.04	57.4	498.255	10.2985	499.017	4.43984
2	365.74	1751.09	0.208864	0.057348	0.001138	0.566162	0.012055	0.071206	0.000665	505.595	42.5875	455.529	7.82152	443.419	4.00998
3	297.209	808.826	0.367457	0.062041	0.001385	0.682822	0.01481	0.079644	0.000785	675.94	48.1425	528.479	8.94341	493.997	4.69764
4	124.043	610.423	0.203207	0.058293	0.00123	0.637613	0.013822	0.078968	0.000681	542.63	46.29	500.827	8.57702	489.962	4.07605
5	556.911	2004.78	0.277791	0.062735	0.001049	0.697321	0.012169	0.080389	0.000795	698.16	39.81	537.19	7.28904	498.445	4.75385
6	149.929	629.14	0.238307	0.059476	0.001293	0.670833	0.015524	0.08127	0.000729	583.36	15.7375	521.219	9.44052	503.697	4.35435
7	704.33	1612.24	0.436864	0.078417	0.001449	0.768617	0.014629	0.070677	0.000641	1166.67	37.0375	578.969	8.40818	440.232	3.864
8	122.002	577.826	0.21114	0.061609	0.001367	0.685529	0.01592	0.08023	0.000815	661.125	47.065	530.111	9.59725	497.496	4.86959
9	129.647	597.626	0.216937	0.059126	0.001382	0.661002	0.015458	0.08078	0.000759	572.255	49.99	515.227	9.45605	500.774	4.53338
10	219.563	882.799	0.248712	0.059363	0.001262	0.667519	0.014739	0.080963	0.000752	588.915	13.885	519.203	8.98156	501.866	4.49428
11	647.533	1496.83	0.432602	0.060628	0.0013	0.671391	0.015074	0.079965	0.000947	627.795	41.66	521.558	9.16463	495.913	5.66161
12	115.368	464.54	0.248349	0.059889	0.001477	0.654522	0.015599	0.079344	0.000849	598.17	53.695	511.258	9.57961	492.205	5.0775
13	219.522	744.024	0.295046	0.058966	0.001277	0.654074	0.014541	0.080046	0.000742	564.85	48.1375	510.983	8.93314	496.4	4.43626
14	217.041	767.883	0.282649	0.061083	0.001217	0.569915	0.011751	0.067612	0.000748	642.61	42.5875	457.959	7.60643	421.753	4.52255
15	580.132	1414.4	0.410161	0.061084	0.00116	0.675524	0.013342	0.079718	0.000572	642.61	36.1075	524.066	8.09346	494.437	3.42378
16	131.675	805.751	0.16342	0.058301	0.001035	0.648648	0.012349	0.080307	0.00073	542.63	43.5125	507.647	7.61358	497.953	4.36561
17	702.857	1726.23	0.407164	0.061006	0.000986	0.667941	0.011231	0.079285	0.000792	638.905	34.1025	519.46	6.84626	491.853	4.73973
18	183.304	781.127	0.234666	0.058121	0.001163	0.637646	0.013281	0.079255	0.000667	600.025	37.96	500.848	8.24159	491.674	3.99099
19	290.635	894.318	0.324979	0.058119	0.001138	0.643932	0.013406	0.08005	0.000718	600.025	37.96	504.738	8.28711	496.422	4.29269
20	83.7322	314.562	0.266187	0.057572	0.001798	0.629804	0.019762	0.079362	0.00082	522.26	73.1375	495.974	12.3165	492.313	4.90321
21	144.623	564.618	0.256143	0.058171	0.001451	0.658201	0.017169	0.081959	0.000909	600.025	55.55	513.513	10.5188	507.803	5.42326
22	187.344	662.322	0.282859	0.057912	0.001226	0.645799	0.014084	0.080843	0.000738	527.815	46.2925	505.89	8.69569	501.151	4.41192
23	124.334	389.632	0.319107	0.058544	0.001584	0.652482	0.021452	0.080142	0.001201	550.035	54.62	510.005	13.1861	496.97	7.1723
24	100.36	571.261	0.175681	0.058535	0.001168	0.64118	0.01401	0.07918	0.000695	550.035	44.4375	503.036	8.67474	491.225	4.1592
25	692.397	1842.1	0.375874	0.057307	0.000978	0.627181	0.011413	0.079289	0.000674	501.89	37.0325	494.338	7.12974	491.875	4.03529
26	87.2933	183.281	0.476281	0.063205	0.003315	0.689676	0.036904	0.079352	0.001208	716.675	117.58	532.606	22.1796	492.254	7.21909
27	611.774	1403.62	0.435853	0.057449	0.001021	0.629166	0.012845	0.079293	0.000804	509.3	34.255	495.576	8.01258	491.904	4.81179
28	164.339	648.473	0.253425	0.059178	0.001355	0.648947	0.015638	0.079534	0.00072	572.255	54.62	507.83	9.63566	493.338	4.30579
29	10.2436	1840.3	0.005566	0.059582	0.001095	0.61854	0.013479	0.075042	0.000769	587.065	40.7325	488.932	8.46225	466.46	4.61591
30	228.851	786.034	0.291146	0.057829	0.001216	0.645395	0.014281	0.081126	0.000813	524.11	46.29	505.641	8.81986	502.839	4.85376
31	291.477	936.874	0.311116	0.057478	0.001321	0.625512	0.014225	0.079023	0.000696	509.3	51.8475	493.296	8.8923	490.287	4.16852
32	157.244	725.03	0.21688	0.058639	0.001263	0.643432	0.014454	0.07959	0.000689	553.74	52.7675	504.429	8.93699	493.674	4.12028
33	230.048	723.6	0.317922	0.057761	0.001252	0.648718	0.014959	0.081268	0.000722	520.41	48.1425	507.69	9.21929	503.686	4.31199
34	397.525	1163.71	0.341602	0.058559	0.001118	0.6605	0.01502	0.081335	0.000937	550.035	40.735	514.92	9.19152	504.089	5.59119
35	194.448	714.384	0.272189	0.057952	0.001291	0.649775	0.015191	0.081058	0.000744	527.815	48.145	508.34	9.3558	502.433	4.44722
36	127.664	499.728	0.255467	0.056325	0.001248	0.629007	0.014765	0.080723	0.000871	464.86	52.7725	495.477	9.20964	500.437	5.20514
37	187.906	651.385	0.288471	0.058757	0.001334	0.66027	0.015325	0.081336	0.000852	566.7	48.1375	514.779	9.37923	504.093	5.08881
38	279.27	920.415	0.303417	0.057597	0.001435	0.632101	0.016332	0.079108	0.000727	522.26	55.55	497.404	10.1662	490.796	4.35302
39	170.487	635.563	0.268246	0.058002	0.00147	0.656999	0.017084	0.081716	0.000885	531.52	55.5475	512.777	10.4749	506.357	5.28358
40	184.841	673.435	0.274475	0.057792	0.001576	0.651065	0.017913	0.081253	0.000882	520.41	63.88	509.134	11.0218	503.6	5.26539
41	99.4218	371.08	0.267925	0.058627	0.002035	0.617	0.020958	0.075845	0.000876	553.74	75.9125	487.965	13.1646	471.273	5.25234
42	195.279	860.532	0.226928	0.058471	0.001551	0.628469	0.016798	0.077401	0.000811	546.33	59.2475	495.142	10.479	480.589	4.85979
43	142.039	200.198	0.70949	0.09028	0.002304	2.9822	0.076264	0.239123	0.00309	1431.48	48.1475	1403.09	19.4691	1382.13	16.0926
44	135.486	588.148	0.23036	0.056791	0.001542	0.623457	0.016729	0.079207	0.000725	483.375	54.625	492.012	10.4684	491.386	4.34015
45	229.601	705.626	0.325386	0.058663	0.001527	0.646397	0.01645	0.079505	0.000698	553.74	55.545	506.259	10.1509	493.168	4.17738
46	269.135	952.348	0.282602	0.061451	0.00134	0.547053	0.012155	0.064152	0.000546	653.72	46.29	443.064	7.98341	400.828	3.31428
47	273.294	834.79	0.32738	0.083704	0.00184	0.920168	0.020622	0.079197	0.000655	1287.04	42.5925	662.449	10.9144	491.329	3.92309
48	125.782	606.459	0.207404	0.058625	0.001372	0.624959	0.014378	0.077087	0.000654	553.74	54.62	492.951	8.99039	478.714	3.92136
49	280.893	960.817	0.292348	0.056799	0.001238	0.624147	0.014332	0.079201	0.000734	483.375	48.145	492.443	8.96603	491.35	4.39284
50	165.058	604.131	0.273215	0.056615	0.001449	0.620752	0.015954	0.079225	0.000735	475.97	55.55	490.319	10.0008	491.494	4.39577
51	190.613	627.132	0.303944	0.062122	0.001614	0.682582	0.018104	0.079289	0.000725	679.64	55.55	528.334	10.9308	491.877	4.33724
52	139.508	585.649	0.238211	0.058316	0.001444	0.637899	0.015823	0.07917	0.000755	542.63	53.695	501.005	9.81482	491.164	4.51588
53	544.396	1152.72	0.47227	0.059419	0.001208	0.653298	0.013948	0.079238	0.000719	583.36	44.435	510.507	8.57341	491.574	4.30143
54	429.797	1151.67	0.373194	0.059134	0.001194	0.62728	0.012879	0.076418	0.000545	572.255	44.435	494.4	8.04319	474.704	3.27241
55	170.793	485.374	0.351879	0.057809	0.001485	0.643578	0.018767	0.080065	0.001074	524.11	62.0275	504.519	11.5991	496.51	6.41709
56	884.167	1380.46	0.640485	0.060761	0.001297	0.670986	0.014401	0.07985	0.000859	631.5	46.29	521.312	8.75779	495.227	5.13736
57	175.892	859.482	0.204649	0.076843	0.001322	1.70116	0.02978	0.159399	0.001204	1116.66	33.7975	1008.97	11.2156	953.434	6.71578
58	208.877	780.248	0.267706	0.058778	0.001346	0.647654	0.014561	0.079504	0.00069	566.7	49.99	507.034	8.98003	493.163	4.12998
59	585.531	1320.58	0.443391	0.063323	0.001632	0.707467	0.020241	0.080049	0.000815	720.38	53.6975	543.241	12.0425	496.414	4.87064
60	156.077	603.261	0.258723	0.057698	0.001488	0.636232	0.016747	0.07941	0.000786	516.705	55.55	499.97	10.3982	492.598	4.70002
61	131.937	847.274	0.155719	0.069012	0.001794	0.767956	0.022118	0.079543	0.000865	898.15	47.995	578.59	12.7091	493.395	5.16958
62	115.42	715.723	0.161264	0.056518	0.001378	0.619865	0.01523	0.078986	0.000722	472.265	53.6975	489.763	9.55257	490.066	4.32109
63	285.134	907.029	0.314361	0.059259	0.001347	0.653917	0.015139	0.07951	0.000698	575.96	52.7675	510.886	9.30095	493.195	4.17494
64	143.218	610.064	0.234759	0.058001	0.001377	0.650456	0.016197	0.080738	0.000777	531.52	56.4725	508.759	9.97041	500.524	4.64058
65	130.006	654.631	0.198595	0.059006	0.001637	0.600018	0.01567	0.073495	0.000589	568.55	61.1	477.245	9.94968	457.175	3.54737
66	209.866	1467.92	0.142968	0.056814	0.001177	0.540892	0.012062	0.068499	0.000636	483.375	44.44	439.012	7.95372	427.105	3.84345
67	879.473	1544.96	0.569252	0.065191	0.001587	0.714676	0.017235	0.079222	0.000952	788.89	51.8475	547.519	10.2131	491.478	5.69428
68	90.9837	362.726	0.250833	0.059014	0.001784	0.656292	0.020379	0.080335	0.000867	568.55	64.805	512.344	12.4979	498.123	5.17947
69	226.409	707.586	0.319974	0.056933	0.001293	0.6264	0.014445	0.079313	0.000645	487.08	49.995	493.851	9.02427	492.02	3.85948
70	202.218	574.62	0.351917	0.064216	0.001946	0.705186	0.0208	0.079202	0.000715	750.005	64.8075	541.884	12.3913	491.356	4.28169
71	5.19646	312.092	0.01665	0.059794	0.001933	0.657569	0.020424	0.079529	0.000799	594.47	70.36	513.126	12.5159	493.309	4.77637
72	286.312	770.795	0.37145	0.062045	0.001307	0.681133	0.014355	0.079316	0.000749	675.94	44.44	527.459	8.67794	492.038	4.48383
73	247.768	752.43	0.329291	0.062225	0.00143	0.683403	0.016207	0.0791	0.00074	683.345	49.995	528.829	9.78221	490.75	4.42911
74	66.7525	337.562	0.197749	0.063311	0.00196	0.695652	0.021188	0.079487	0.000754	720.38	66.66	536.191	12.6929	493.059	4.51349
75	175.75	636.593	0.276078	0.05924	0.001456	0.651936	0.016466	0.079343	0.000748	575.96	53.6925	509.669	10.127	492.2	4.47723
W4-3 Gneissic granodiorite (GPS: N42°46'07", E86°16'48")
1	131.6	589.58	0.22321	0.05651	0.00072	0.57875	0.00704	0.07429	0.00077	472	12	464	5	462	5
2	186.31	984.34	0.189274	0.05678	0.0005	0.58222	0.00486	0.07437	0.00073	483	10	466	3	462	4
3	161.58	813.63	0.198591	0.05572	0.00124	0.57523	0.01221	0.07487	0.00066	441	31	461	8	465	4
4	223.18	641.16	0.348088	0.05609	0.00123	0.57381	0.01199	0.07421	0.00089	456	26	460	8	461	5
5	299.05	1090.07	0.27434	0.05642	0.0018	0.58371	0.01772	0.07504	0.00088	469	46	467	11	466	5
6	205.45	910.89	0.225549	0.05663	0.0008	0.58106	0.0078	0.07442	0.00079	477	14	465	5	463	5
7	273.05	1516.13	0.180097	0.05653	0.00051	0.5791	0.00498	0.07431	0.00074	473	10	464	3	462	4
8	235.28	676.13	0.34798	0.05647	0.00063	0.58427	0.0062	0.07504	0.00076	471	11	467	4	466	5
9	203.66	840.33	0.242357	0.05662	0.00055	0.58216	0.00538	0.07457	0.00075	477	10	466	3	464	4
10	98.89	392.19	0.252148	0.05693	0.00091	0.58381	0.00886	0.07437	0.00081	489	16	467	6	462	5
11	160.67	487.41	0.32964	0.05658	0.00065	0.58154	0.00643	0.07454	0.00076	475	11	465	4	463	5
12	179.81	651.57	0.275964	0.05602	0.00057	0.57859	0.00561	0.07491	0.00075	453	10	464	4	466	4
13	65.26	657.52	0.0992517	0.0568	0.00057	0.58563	0.00564	0.07477	0.00075	484	10	468	4	465	4
14	154.46	672.12	0.22981	0.05641	0.0006	0.58062	0.0059	0.07464	0.00076	469	10	465	4	464	5
15	143.77	671.16	0.214211	0.05587	0.00164	0.57798	0.00807	0.07503	0.00051	447	19	463	5	466	3
16	158.13	1230.51	0.128508	0.0565	0.00049	0.58464	0.00487	0.07505	0.00075	472	10	467	3	467	4
17	119.49	912.47	0.130952	0.05619	0.00051	0.58095	0.00501	0.07498	0.00075	460	10	465	3	466	4
18	211.02	1377.17	0.153227	0.05643	0.00046	0.58066	0.00452	0.07463	0.00074	469	10	465	3	464	4
JT47-1 Gneissic granite (GPS: N42°44'56", E86°18'51")
1	2214	1399	1.58	0.06074	0.00138	0.5579	0.01323	0.0666	0.00089	630	29	450	9	416	5
2	1918	1447	1.33	0.05557	0.001	0.50532	0.0098	0.06595	0.00085	435	22	415	7	412	5
3	957	701	1.36	0.06169	0.00119	0.56151	0.01161	0.066	0.00086	663	23	453	8	412	5
4	1029	773	1.33	0.05848	0.00164	0.53864	0.01541	0.06679	0.00092	548	39	438	10	417	6
5	3212	1634	1.97	0.05821	0.00109	0.53893	0.01079	0.06714	0.00087	538	23	438	7	419	5
6	1547	1359	1.14	0.05515	0.00107	0.50703	0.0105	0.06667	0.00087	418	24	416	7	416	5
7	975	898	1.09	0.05519	0.00126	0.50657	0.01209	0.06655	0.00088	420	30	416	8	415	5
8	1445	1075	1.34	0.0562	0.00123	0.52332	0.012	0.06752	0.00089	460	28	427	8	421	5
9	630	618	1.02	0.05924	0.00189	0.52813	0.01702	0.06465	0.00092	576	45	431	11	404	6
10	1891	1634	1.16	0.05517	0.00117	0.51436	0.01149	0.06761	0.00089	419	27	421	8	422	5
11	1065	1098	0.97	0.05564	0.00104	0.51505	0.01039	0.06713	0.00087	438	23	422	7	419	5
12	803	693	1.16	0.05576	0.00114	0.51943	0.01128	0.06755	0.00088	443	26	425	8	421	5
13	1239	1334	0.93	0.05562	0.00105	0.49845	0.0101	0.06499	0.00085	437	23	411	7	406	5
14	552	472	1.17	0.0584	0.00155	0.52998	0.01449	0.0658	0.00089	545	36	432	10	411	5
15	1489	1166	1.28	0.05581	0.00122	0.51157	0.01175	0.06647	0.00088	445	28	420	8	415	5
16	1446	1118	1.29	0.05708	0.00108	0.52937	0.01072	0.06725	0.00088	495	23	431	7	420	5
17	481	375	1.28	0.05999	0.00218	0.53921	0.01973	0.06518	0.00094	603	54	438	13	407	6
18	773	862	0.9	0.05507	0.00109	0.50092	0.01057	0.06596	0.00086	415	25	412	7	412	5
19	840	655	1.28	0.05496	0.00123	0.50529	0.01192	0.06667	0.00088	411	30	415	8	416	5
20	2630	1212	2.17	0.06085	0.00118	0.5576	0.01163	0.06645	0.00087	634	24	450	8	415	5
21	1105	848	1.3	0.05444	0.00137	0.49517	0.0129	0.06596	0.00089	389	35	408	9	412	5
22	782	683	1.15	0.05508	0.00123	0.51116	0.01203	0.0673	0.00089	415	30	419	8	420	5
23	676	645	1.05	0.05535	0.00124	0.50603	0.01192	0.0663	0.00087	426	30	416	8	414	5
24	1428	1082	1.32	0.0557	0.00117	0.51254	0.01138	0.06673	0.00088	440	27	420	8	416	5
12W26-1 Rhyolitic tuff (GPS: N42°48'10", E86°07'11")
1	206.974	224.671	0.921229	0.0551115	0.00362853	0.494425	0.0336108	0.0646237	0.000891936	416.715	152.762	407.922	22.8384	403.684	5.40517
2	168.433	294.436	0.572052	0.0551467	0.00418183	0.493511	0.0367201	0.0648687	0.0011988	416.715	174.98	407.3	24.9662	405.167	7.26049
3	85.1431	195.763	0.434928	0.0551429	0.00239255	0.490207	0.0204344	0.0651279	0.000823482	416.715	102.767	405.052	13.9261	406.736	4.98875
4	94.7468	271.235	0.349316	0.0549612	0.00201713	0.495874	0.0193477	0.0651116	0.000781515	409.31	86.1025	408.905	13.1359	406.637	4.73509
5	158.621	352.525	0.449956	0.0549028	0.00221274	0.496253	0.0195474	0.0653602	0.000661881	409.31	86.1025	409.163	13.2681	408.141	4.01105
6	103.538	220.978	0.468544	0.054906	0.00303664	0.490986	0.0269073	0.0645202	0.00107012	409.31	124.062	405.582	18.3263	403.057	6.48398
7	170.842	299.829	0.569796	0.0548776	0.00185665	0.495241	0.0167021	0.0652141	0.000737802	405.605	74.065	408.476	11.3454	407.258	4.47041
8	200.394	421.684	0.475223	0.0550119	0.00181212	0.492771	0.0157736	0.0647408	0.000662282	413.01	69.4375	406.797	10.7328	404.393	4.01569
9	150.699	236.659	0.636776	0.0549388	0.00226156	0.495954	0.0204097	0.0650329	0.000797247	409.31	87.955	408.96	13.8559	406.161	4.83054
10	118.385	193.251	0.612594	0.0542077	0.00231224	0.486839	0.0189968	0.0648325	0.000719156	388.94	96.2875	402.754	12.9761	404.948	4.3592
11	157.735	235.814	0.668895	0.0549208	0.00323053	0.495108	0.0267604	0.0654252	0.00112638	409.31	163.87	408.385	18.1761	408.535	6.81881
12	125.36	208.067	0.6025	0.054919	0.00223565	0.496576	0.0202109	0.0650616	0.000747634	409.31	87.955	409.382	13.7154	406.334	4.53046
13	234.028	520.491	0.449629	0.0540455	0.00160686	0.489288	0.0148887	0.0649965	0.000677527	372.275	66.66	404.425	10.1547	405.94	4.10692
14	725.42	1117.3	0.649263	0.0541963	0.0013888	0.492461	0.0127946	0.0653217	0.000670371	388.94	57.4	406.586	8.70906	407.909	4.06249
15	138.32	319.746	0.432593	0.0553759	0.00239023	0.496158	0.0200254	0.0646664	0.000871437	427.825	96.2875	409.099	13.5933	403.942	5.28094
16	45.7985	79.0337	0.579481	0.055026	0.00323131	0.489386	0.0281356	0.0652512	0.00104156	413.01	131.468	404.492	19.1833	407.482	6.3069
17	154.159	252.329	0.610945	0.0550273	0.00223233	0.494621	0.0193567	0.0651252	0.000844721	413.01	90.73	408.055	13.1531	406.719	5.11719
18	227.128	603.604	0.376286	0.0548811	0.00189031	0.491339	0.0165823	0.0646323	0.000674089	405.605	77.77	405.822	11.2935	403.736	4.08747
19	144.242	158.503	0.910027	0.0654537	0.0023104	1.12992	0.036623	0.125776	0.00111942	790.74	69.4375	767.718	17.4668	763.721	6.4233
20	209.338	257.204	0.813897	0.0549328	0.00210922	0.487318	0.0177329	0.0647625	0.000763677	409.31	87.0275	403.081	12.1092	404.524	4.6287
21	124.451	259.96	0.478733	0.0542923	0.0025664	0.489124	0.0223107	0.0654266	0.00101064	383.385	107.397	404.313	15.2154	408.543	6.11892
22	49.7873	107.407	0.463537	0.0886131	0.00243682	2.96066	0.0818151	0.24211	0.00291487	1395.99	52.625	1397.58	20.9962	1397.66	15.1467
12W28 Meta-andesite (GPS: N42°48'31", E86°07'36")
1	40.6648	49.3185	0.824534	0.055529	0.004192	0.650855	0.049259	0.084968	0.001414	435.23	168.5	509.005	30.2995	525.707	8.40671
2	25.2187	33.7457	0.747316	0.059359	0.005098	0.687474	0.054484	0.086423	0.001649	588.915	188.865	531.282	32.786	534.345	9.79119
3	961.622	244.745	3.92908	0.057555	0.002027	0.685868	0.023678	0.085995	0.001013	522.26	75.9175	530.315	14.2653	531.809	6.021
4	1640.42	466.748	3.51458	0.060302	0.001742	0.721909	0.020794	0.086014	0.000883	612.98	62.9525	551.793	12.2675	531.921	5.24877
5	69.6553	72.4369	0.9616	0.053908	0.003219	0.636078	0.036244	0.08615	0.001371	368.57	132.395	499.875	22.4963	532.725	8.14154
6	413.246	97.6212	4.23315	0.060802	0.002881	0.725574	0.034515	0.086286	0.001251	631.5	101.838	553.952	20.3132	533.532	7.43041
7	229.367	222.518	1.03078	0.058667	0.002138	0.6984	0.024778	0.085865	0.000959	553.74	79.6175	537.835	14.8182	531.033	5.7031
8	39.1844	45.7506	0.856479	0.06046	0.00463	0.717902	0.054748	0.086956	0.001722	620.39	160.165	549.428	32.3615	537.508	10.2144
9	91.3567	95.8525	0.953096	0.058448	0.003017	0.694969	0.03549	0.086393	0.001223	546.33	113.718	535.781	21.2638	534.171	7.26306
10	165.377	52.9943	3.12066	0.064877	0.009467	0.775562	0.10924	0.086989	0.0022	770.06	311.09	582.949	62.4721	537.706	13.0515
11	61.8966	70.7258	0.875162	0.061421	0.003236	0.728642	0.037776	0.086328	0.001373	653.72	82.3975	555.756	22.1925	533.784	8.15089
12	38.8782	45.5178	0.854132	0.062134	0.006605	0.719923	0.067393	0.0862	0.002015	679.64	232.385	550.622	39.788	533.021	11.9627
13	1134.17	210.953	5.3764	0.060727	0.002198	0.718833	0.025559	0.085624	0.001045	629.34	77.765	549.978	15.1034	529.607	6.21415
14	888.168	140.937	6.30187	0.061815	0.002556	0.732997	0.030056	0.085737	0.001189	733.34	88.875	558.311	17.614	530.275	7.06384
15	43.2799	48.1187	0.89944	0.06246	0.005012	0.73824	0.058573	0.085634	0.0018	700.01	172.2	561.378	34.2171	529.667	10.6906
16	746.148	386.374	1.93115	0.062738	0.001862	0.74267	0.020126	0.085756	0.000903	698.16	62.9575	563.962	11.7328	530.391	5.3705
17	56.7766	63.9909	0.88726	0.058987	0.006588	0.677651	0.071565	0.085872	0.001711	564.85	246.268	525.354	43.3154	531.075	10.1605
12W30-2 Granodiorite (GPS: N42°49'43", E86°07'44")
1	70.6	132	0.53	0.05601	0.0024	0.44704	0.01909	0.05788	0.00086	453	68	375	13	363	5
2	254	382	0.66	0.05255	0.00287	0.42289	0.02282	0.05836	0.00097	309	93	358	16	366	6
3	95.3	182	0.52	0.05411	0.00369	0.44011	0.02963	0.05899	0.00106	376	120	370	21	369	6
4	121	223	0.55	0.05501	0.00203	0.42744	0.01579	0.05635	0.00079	413	57	361	11	353	5
5	108	196	0.55	0.05535	0.00248	0.43523	0.01941	0.05702	0.00085	426	73	367	14	357	5
6	80.1	109	0.73	0.05271	0.00341	0.40675	0.02612	0.05596	0.00094	316	116	347	19	351	6
7	195	225	0.86	0.0522	0.00242	0.41438	0.01914	0.05756	0.00086	294	78	352	14	361	5
8	102	129	0.79	0.05519	0.00426	0.43412	0.03332	0.05704	0.00093	420	144	366	24	358	6
9	112	200	0.56	0.05397	0.00258	0.4348	0.02065	0.05843	0.0009	370	79	367	15	366	5
10	214	241	0.89	0.05255	0.00249	0.41128	0.01936	0.05676	0.00087	309	79	350	14	356	5
11	100	147	0.68	0.05371	0.00278	0.42954	0.022	0.05799	0.00092	359	87	363	16	363	6
12	147	168	0.87	0.05565	0.00273	0.43587	0.02115	0.0568	0.00089	438	80	367	15	356	5
13	237	388	0.61	0.05604	0.00247	0.43864	0.0192	0.05677	0.00084	454	71	369	14	356	5
14	87.7	142	0.62	0.05405	0.00309	0.42615	0.02422	0.05718	0.0009	373	100	360	17	358	5
15	86.8	128	0.68	0.05399	0.0037	0.43417	0.02958	0.05832	0.00091	371	126	366	21	365	6
16	139	217	0.64	0.0551	0.00229	0.44176	0.01824	0.05814	0.00086	416	66	371	13	364	5
17	75.1	116	0.65	0.05971	0.00371	0.4745	0.02926	0.05762	0.00094	593	106	394	20	361	6
18	113	182	0.62	0.05418	0.00253	0.42906	0.01988	0.05742	0.00088	379	77	363	14	360	5
19	165	192	0.86	0.05796	0.00237	0.46509	0.01894	0.05819	0.00084	528	64	388	13	365	5
087-2 Diorite (GPS: N42°51'11", E86°06'49")
1	88.39	138.1	0.64	0.05443	0.00206	0.44054	0.01703	0.05871	0.00084	389	61	371	12	368	5
2	116.5	193.56	0.6	0.05329	0.00114	0.42446	0.00979	0.05777	0.00081	341	28	359	7	362	5
3	64.85	110.12	0.59	0.054	0.00221	0.42658	0.01772	0.05729	0.00085	371	67	361	13	359	6
4	119.63	161.5	0.74	0.0541	0.0016	0.4389	0.01344	0.05884	0.00083	375	44	369	9	369	5
5	105.29	152.81	0.69	0.05338	0.00231	0.42681	0.0188	0.05799	0.00082	345	74	361	13	363	6
6	163.78	184.39	0.89	0.05441	0.00199	0.43978	0.01649	0.05863	0.00082	388	59	370	12	367	5
7	69.91	101.19	0.69	0.05383	0.00279	0.4369	0.02288	0.05887	0.00086	364	92	368	16	369	5
8	218.38	225.41	0.97	0.05339	0.00186	0.43313	0.01552	0.05883	0.00083	345	55	365	11	369	5
9	109.75	199.85	0.55	0.05394	0.00204	0.42967	0.01664	0.05778	0.00081	369	62	363	12	362	5
10	89.19	141.3	0.63	0.05358	0.00179	0.43364	0.01487	0.0587	0.00083	353	52	366	11	368	5
11	100.22	161.29	0.62	0.05403	0.00138	0.43691	0.01167	0.05865	0.00083	372	35	368	8	367	5
12	103.29	168.89	0.61	0.05418	0.00214	0.43854	0.01766	0.0587	0.00083	379	65	369	12	368	6
13	95.72	141.06	0.68	0.054	0.00175	0.43645	0.01449	0.05861	0.00084	371	49	368	10	367	5
14	138.71	181.79	0.76	0.05334	0.00131	0.43222	0.01111	0.05877	0.00082	343	34	365	8	368	5
15	66.73	109.72	0.61	0.05378	0.00181	0.43202	0.01488	0.05826	0.00084	362	52	365	11	365	5
16	141.31	165.04	0.86	0.05355	0.00152	0.43432	0.01277	0.05882	0.00082	352	41	366	9	368	5
17	132.71	201.18	0.66	0.0545	0.00178	0.43688	0.01467	0.05813	0.00082	392	50	368	10	364	5
18	149.91	200.75	0.75	0.05441	0.00115	0.44366	0.01	0.05913	0.00082	388	27	373	7	370	5
19	100.56	167.55	0.6	0.05375	0.00214	0.42818	0.01738	0.05776	0.0008	361	66	362	12	362	5
20	110.34	165.87	0.67	0.05335	0.00213	0.42752	0.01736	0.05812	0.00082	344	66	361	12	364	5
21	190.79	233.72	0.82	0.05358	0.00135	0.43193	0.01138	0.05846	0.00081	353	35	365	8	366	5
22	168.85	223.06	0.76	0.05402	0.00112	0.43103	0.0096	0.05786	0.00079	372	27	364	7	363	5
23	153.27	219.9	0.7	0.05379	0.00109	0.43504	0.00947	0.05864	0.0008	362	26	367	7	367	5
24	329.82	414.75	0.8	0.05367	0.00096	0.42932	0.00844	0.058	0.00079	357	22	363	6	363	5
25	117.96	198.14	0.6	0.05441	0.00176	0.43504	0.01446	0.05798	0.0008	388	50	367	10	363	5
26	107.42	166.44	0.65	0.05444	0.00198	0.44166	0.01641	0.05882	0.00082	389	58	371	12	368	7
27	257.45	324.22	0.79	0.05441	0.00143	0.43873	0.01201	0.05847	0.0008	388	37	369	8	366	5
28	175.05	224.93	0.78	0.05335	0.00159	0.41825	0.01293	0.05685	0.00078	344	45	355	9	356	5
29	264.95	351.67	0.75	0.05377	0.00105	0.43112	0.00907	0.05814	0.00079	361	25	364	6	364	5
30	419.79	423.99	0.99	0.05394	0.00094	0.43684	0.00837	0.05872	0.00079	369	21	368	6	368	5
31	95.62	164.09	0.58	0.05429	0.00192	0.43793	0.01587	0.05849	0.00081	383	56	369	11	366	5
32	108.46	171.39	0.63	0.05395	0.00128	0.43729	0.01088	0.05877	0.00081	369	32	368	8	368	5
12W36 Andesite (GPS: N42°52'51", E86°07'37")
1	161.388	168.558	0.957463	0.0544891	0.00304336	0.462091	0.0251517	0.0628168	0.00100176	390.79	130.542	385.711	17.4691	392.733	6.07977
2	118.472	150.809	0.785574	0.0550729	0.00282684	0.47011	0.0244281	0.0624577	0.00086006	416.715	116.655	391.265	16.8742	390.555	5.22264
3	240.85	233.181	1.03289	0.0548859	0.00207042	0.471309	0.0174044	0.0624501	0.00076308	409.31	89.805	392.093	12.0141	390.509	4.63479
4	68.3837	133.285	0.513064	0.0551551	0.00269257	0.471704	0.0222592	0.0624649	0.000806378	416.715	109.248	392.365	15.3598	390.598	4.89717
5	229.157	240.608	0.95241	0.0545463	0.00211445	0.468465	0.0177354	0.0626645	0.000755482	394.495	87.0275	390.128	12.2662	391.809	4.58784
6	233.583	267.921	0.871836	0.0519737	0.00230956	0.452948	0.0205522	0.0629634	0.000908103	283.395	97.2075	379.342	14.3651	393.622	5.51135
7	321.373	281.183	1.14293	0.0544453	0.00232256	0.474656	0.0210126	0.0629443	0.000874021	390.79	91.6575	394.4	14.4708	393.506	5.30492
8	139.634	202.514	0.689501	0.0553689	0.00242024	0.47438	0.0196995	0.0624338	0.000741289	427.825	96.2875	394.21	13.5694	390.41	4.50277
9	55.8805	277.622	0.201283	0.0564313	0.0020066	0.482329	0.0169924	0.0621413	0.000647221	477.82	79.62	399.669	11.6428	388.635	3.93376
10	250.02	250.592	0.997717	0.055063	0.00246187	0.474948	0.0202629	0.0632047	0.00070056	413.01	99.99	394.601	13.952	395.086	4.25298
11	94.7583	128.23	0.738971	0.0543183	0.00285517	0.467144	0.0248282	0.0620024	0.000985833	383.385	118.507	389.214	17.1852	387.792	5.98772
12	17.7412	141.757	0.125153	0.0557136	0.00267671	0.476636	0.0237339	0.0619334	0.000932355	442.64	105.545	395.762	16.3224	387.373	5.66368
13	135.22	360.445	0.375147	0.0547261	0.00192762	0.468855	0.0168123	0.0619843	0.000679023	466.71	79.62	390.397	11.6249	387.682	4.12709
14	67.6248	96.8725	0.698081	0.0550575	0.00374515	0.471035	0.0313741	0.0625569	0.000872108	413.01	153.688	391.903	21.6576	391.157	5.2952
15	39.5391	130.132	0.303838	0.0559733	0.0031518	0.474967	0.0266361	0.062364	0.000948018	450.045	125.912	394.614	18.3385	389.986	5.75642
16	141.397	148.802	0.950231	0.0550751	0.00331724	0.472745	0.0287062	0.0621008	0.000855722	416.715	135.17	393.083	19.7933	388.389	5.19803
